# Supplementary material
Source: Springer Nature journal article supplement (https://www.springermedizin.de/resource/supplementary/12865_2009_263_MOESM5_ESM.pdf/9427628)

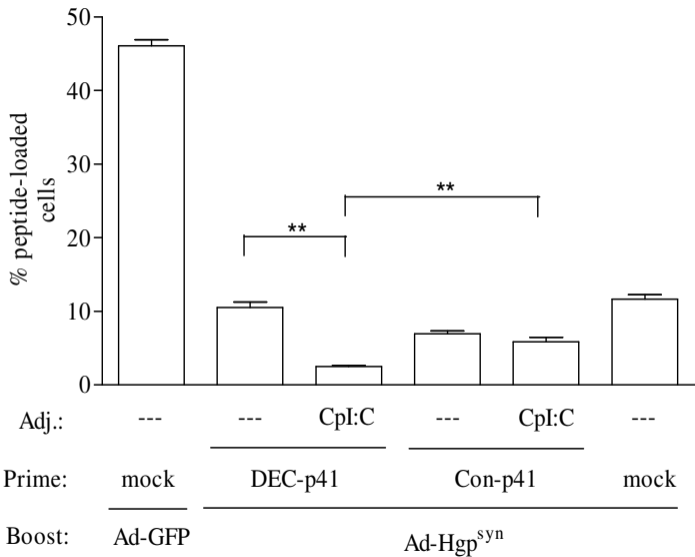

Supplement: MOESM5 [file 9427628]
